# Supplementary material for: Characterization of the Antimicrobial Activities of Trichoplusia ni Cecropin A as a High-Potency Therapeutic against Colistin-Resistant Escherichia coli
Source: MDPI journal article supplement (doi:10.3390/pharmaceutics15061752), 2023-06-16
Supplement: s1 [file s1]

# Supplementary Materials: Characterization of the Antimicrobial Activities of *Trichoplusia ni* Cecropin A as a High-potency Therapeutic against Colistin-resistant *Escherichia coli*

Hyeju Lee, Byeongkwon Kim, Minju Kim, Seoyeong Yoo, Jinkyong Lee, Eunha Hwang and Yangmee Kim

This PDF file includes:

Figure S1. Characterization of synthesized *T. ni* cecropin by high-performance liquid chromatography (HPLC) and mass spectrometry (MS). (a) HPLC chromatogram of synthesized *T. ni* cecropin. (b) MS chromatogram of synthesized *T. ni* cecropin. m/z indicates mass divided by charge number.

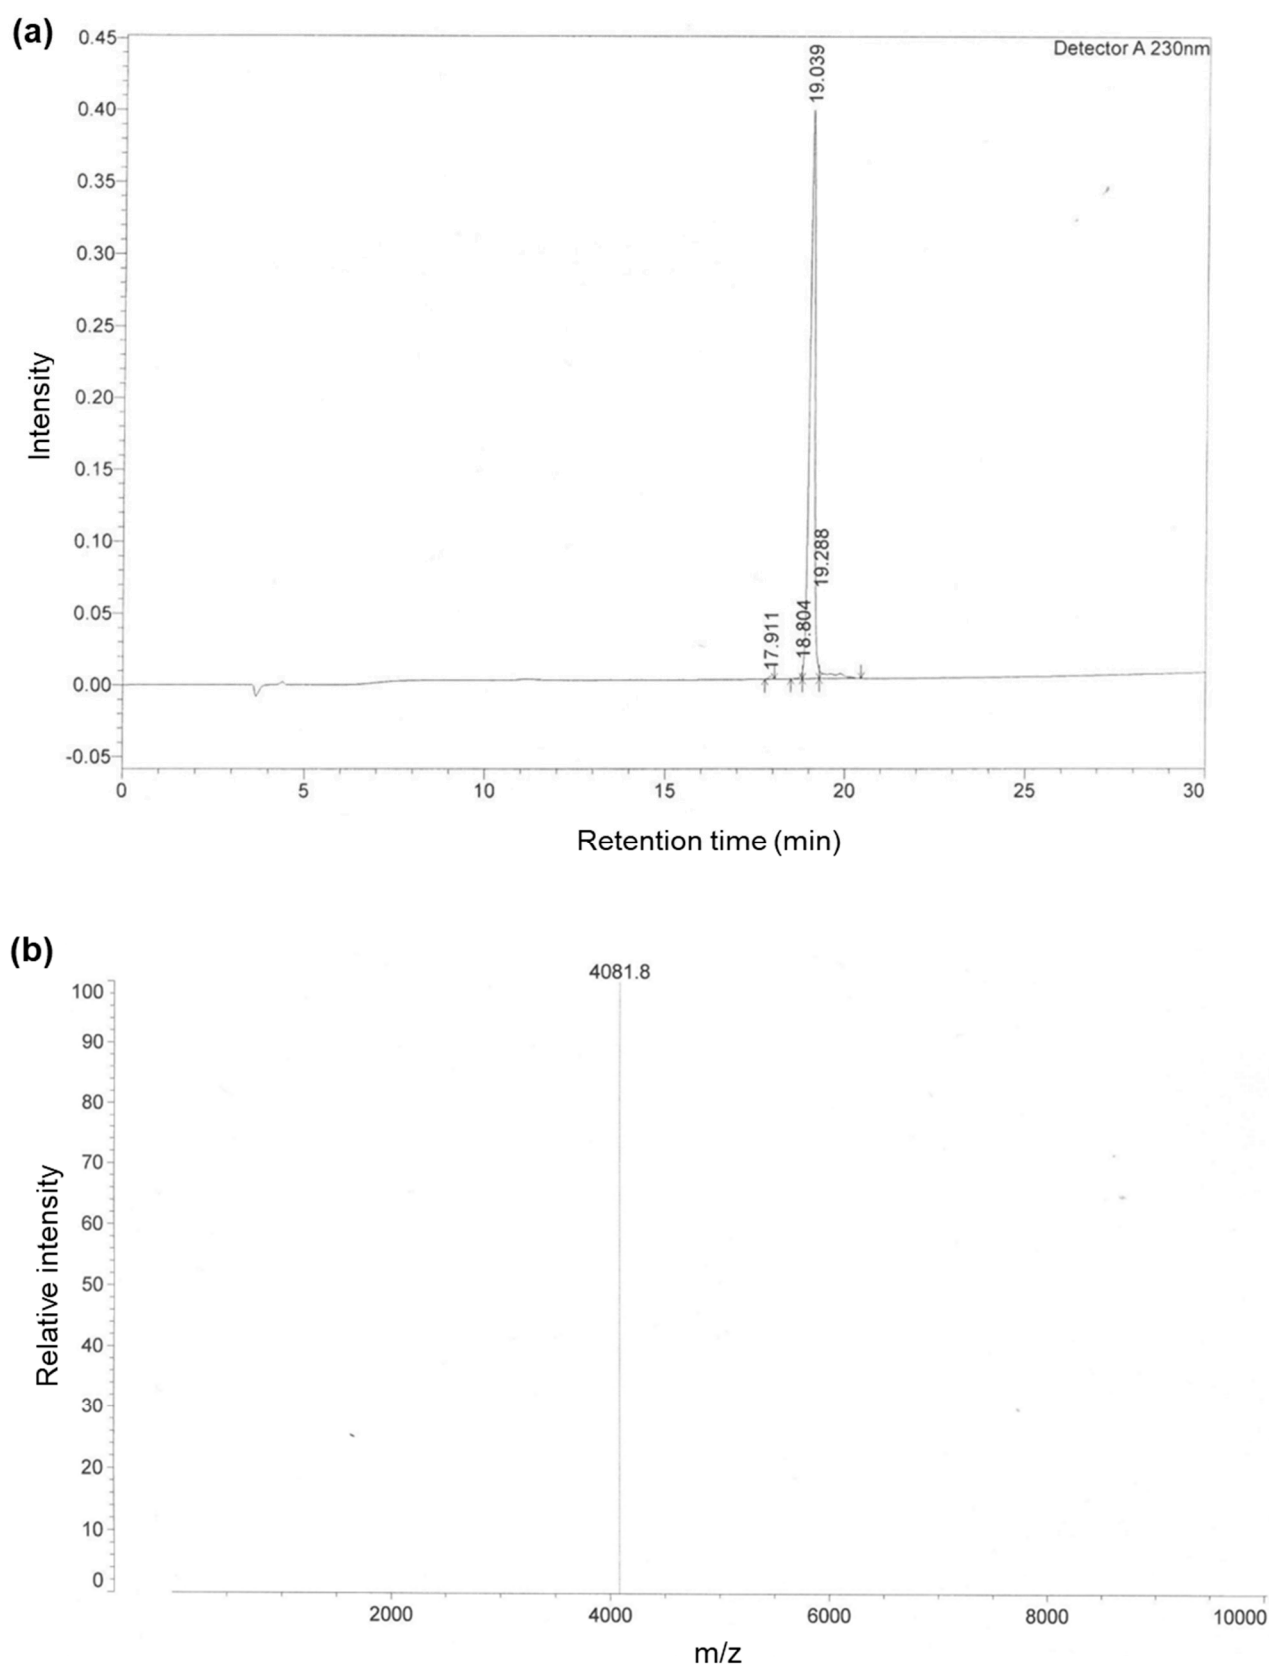

**Figure S1.** Characterization of synthesized *T. ni* cecropin by high-performance liquid chromatography (HPLC) and mass spectrometry (MS). (a) HPLC chromatogram of synthesized *T. ni* cecropin. (b) MS chromatogram of synthesized *T. ni* cecropin. m/z indicates mass divided by charge number.
